# Supplementary material for: Rational design of FeOx-MoP@MWCNT composite electrocatalysts toward efficient overall water splitting
Source: Royal Society of Chemistry journal article supplement (doi:10.1039/d1cc01585k), 2021-01-01
Supplement: d1cc01585k1.pdf [file d1cc01585k1.pdf]

## **Rational design of FeO<sub>x</sub>-MoP@MWCNTs composite electrocatalysts toward efficient overall water splitting**

Aijian Wang<sup>a,\*</sup>, Xiaoliang Shen<sup>a</sup>, Qi Wang<sup>a</sup>, Laixiang Cheng<sup>a</sup>, Xiaodong Chen<sup>a,\*</sup>,  
Cuncai Lv<sup>b,\*</sup>, Weihua Zhu<sup>a</sup> and Longhua Li<sup>a</sup>

<sup>a</sup> School of Chemistry & Chemical Engineering, Jiangsu University, Zhenjiang 212013, P.R. China

<sup>b</sup> Key Laboratory of High-precision Computation and Application of Quantum Field Theory of Hebei Province, The College of Physics Science and Technology, Hebei University, Baoding 071002, PR China

Corresponding Author. Tel: +86-511-88791928. E-mail: wajujs@ujs.edu.cn, cxdoyy@163.com, lvcuncai@163.com

### **Experimental section**

#### **Reagents and materials**

Molybdenum pentachloride (MoCl<sub>5</sub>), potassium hydroxide (KOH), ferric chloride (FeCl<sub>3</sub>·6H<sub>2</sub>O) and sodium phosphate (NaH<sub>2</sub>PO<sub>4</sub>·2H<sub>2</sub>O) were obtained from Sinopharm Chemical Reagent Co., Ltd. MWCNTs were purchased from Beijing DK Nano Technology and used as received. The deionized water used in all experimental processes was obtained through an Ulupure system.

#### **Physicochemical characterization**

The morphologies, composition and structure of the as-prepared samples were investigated by the X-ray diffraction (XRD) pattern (a XD-3 diffractometer with Cu Kα radiation), Raman spectra (a Renishaw Invia Raman Microscope), scanning electron microscopy (SEM, a Model S4800, Hitachi), X-ray photoelectron spectroscopy (XPS, a RBD upgraded PHI-5000C ESCA), transmission electron microscopy (TEM, a JEM-2100 HR, JEOL system) and Brunauer-Emmett-Teller (BET) specific surface areas (a Quantachrome Nove 2000e sorption analyzer).

#### **Electrochemical measurements**

All electrochemical measurements were performed on a CHI 614E

electrochemical workstation (CH Instrument, China) in 1.0 M KOH solution with a scan rate of 2 mV/s. The sample covered glassy carbon electrode with 3 mm diameter is employed as the working electrode, a Pt gauze ( $1 \times 1 \text{ cm}^2$ ) as the counter electrode and a mercury/mercury oxide electrode (MOE) as the reference electrode. The long-term stability of the samples was also examined by using the same electrolyzer. To prepare the working electrode, the catalysts (2 mg) and Nafion solution (5wt%, 40  $\mu\text{L}$ ) were dispersed in  $\text{CH}_3\text{CH}_2\text{OH}$  (0.5 mL), then the solution was sonicated for 1.0 h to give the homogeneous ink. Subsequently, the well-mixed suspension (15  $\mu\text{L}$ ) was loaded onto the polished glassy carbon electrode. The obtained electrode was then dried naturally at room temperature and retained for use. The measured potential in this work has been calibrated with the reversible hydrogen electrode potential (RHE) based on Nernst equations. The electrochemical impedance spectroscopy (EIS) measurement was recorded in the frequencies ranging from 0.01 Hz to 100 KHz with an amplitude of 1 mV. The double-layer capacitance of the as-synthesized samples is determined by the cyclic voltammograms with different scan rates (20, 40, 60, 80, and 100 mV/s) in the scope of 0.1-0.2 V vs. RHE.

### **Preparation of $\text{FeO}_x\text{-MoP@MWCNTs}$ composite electrocatalysts**

In a typical synthetic route to prepare  $\text{FeO}_x\text{-MoP@MWCNTs}$  composite electrocatalysts, a certain amount of  $\text{FeCl}_3 \cdot 6\text{H}_2\text{O}$ ,  $\text{MoCl}_5$  (30 mg),  $\text{NaH}_2\text{PO}_4$  (120 mg), polyvinylpyrrolidone (30 mg) and MWCNTs (5 mg) were added into deionized water (50 mL) to form a homogeneous aqueous solution by ultrasonic treatment. Solid powder was obtained by removing the solvent under 60  $^\circ\text{C}$ . Then, the powder was calcined at 750  $^\circ\text{C}$  for 5 h with a heating rate of 10  $^\circ\text{C min}^{-1}$  under  $\text{N}_2$  flow to generate  $\text{FeO}_x\text{-MoP@MWCNT}$  composite electrocatalysts. In the present case, the amount of  $\text{MoCl}_5$  was fixed while the content of  $\text{FeCl}_3 \cdot 6\text{H}_2\text{O}$  is varied. The samples with different  $\text{FeCl}_3 \cdot 6\text{H}_2\text{O}:\text{MoCl}_5$  mass ratios of 1:15, 2:15 and 3:15 are denoted as  $\text{FeO}_x\text{-MoP@MWCNT-1}$ ,  $\text{FeO}_x\text{-MoP@MWCNT-2}$  and  $\text{FeO}_x\text{-MoP@MWCNT-3}$ , respectively. For comparison, the  $\text{FeO}_x\text{-MoP}$  was also fabricated in the same way to  $\text{FeO}_x\text{-MoP@MWCNT}$  composite electrocatalysts, just without adding MWCNTs.

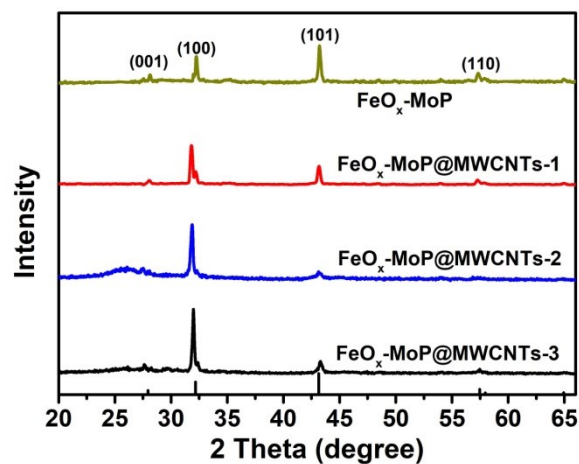

Figure S1. XRD patterns of the as-prepared samples.

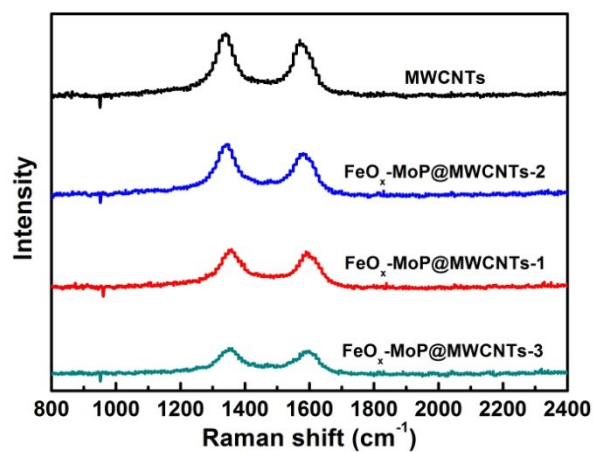

Figure S2. Raman spectra of the as-prepared samples.

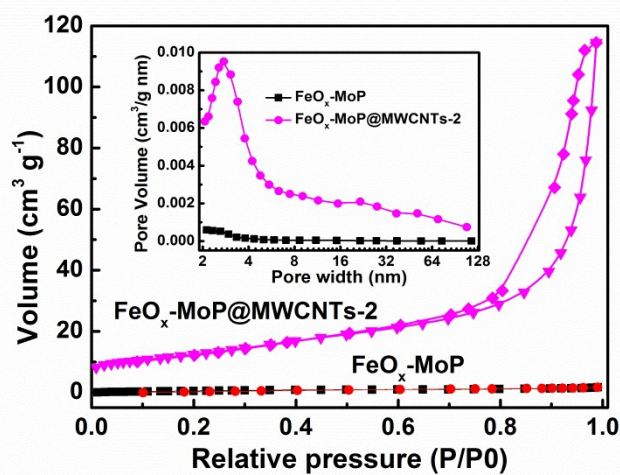

Figure S3. Nitrogen adsorption-desorption isotherms of  $\text{FeO}_x\text{-MoP}$  and  $\text{FeO}_x\text{-MoP@MWCNTs-2}$  (Inset is the pore distribution of above two samples.)

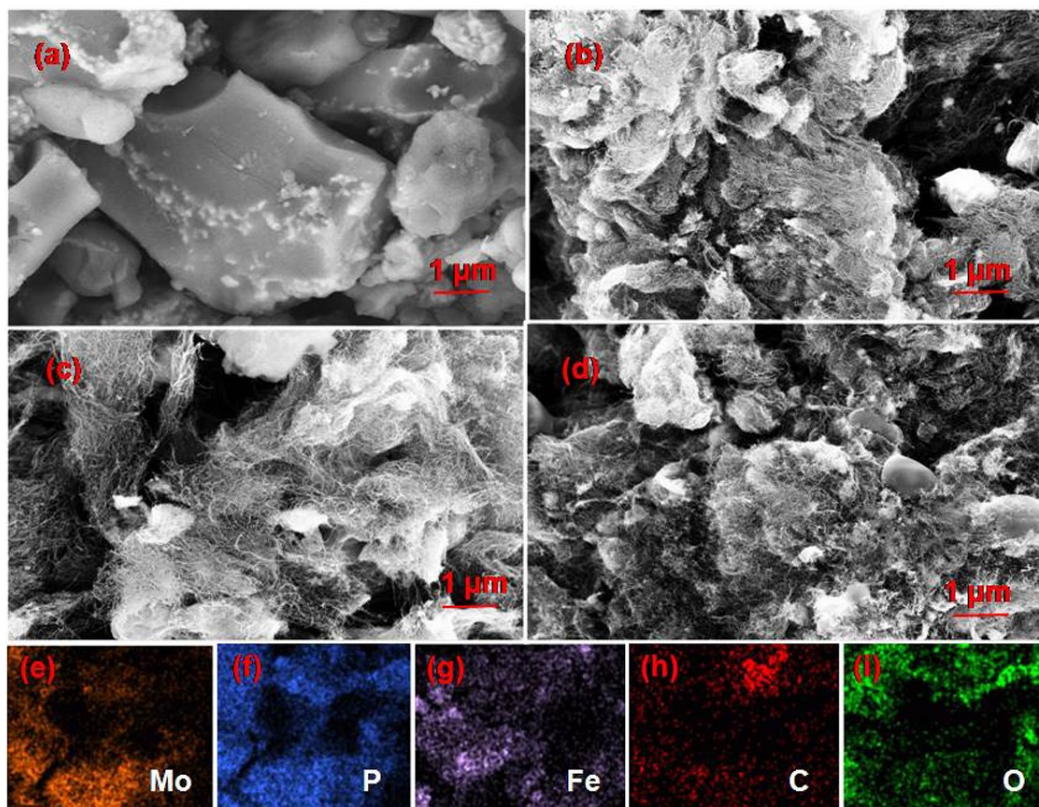

Figure S4. SEM images of (a) FeO<sub>x</sub>-MoP, (b) FeO<sub>x</sub>-MoP@MWCNTs-1, (c) FeO<sub>x</sub>-MoP@MWCNTs-2 and (d) FeO<sub>x</sub>-MoP@MWCNTs-3; and elemental mapping images of (e) Mo, (f) P, (g) Fe, (h) C and (i) O for FeO<sub>x</sub>-MoP@MWCNTs-2.

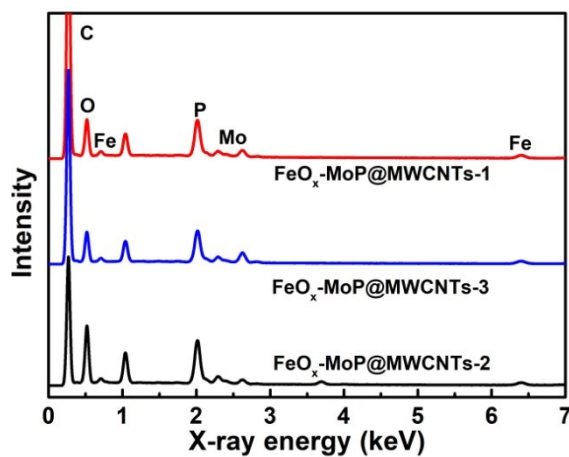

Figure S5. The energy-dispersive X-ray spectra of the as-prepared samples.

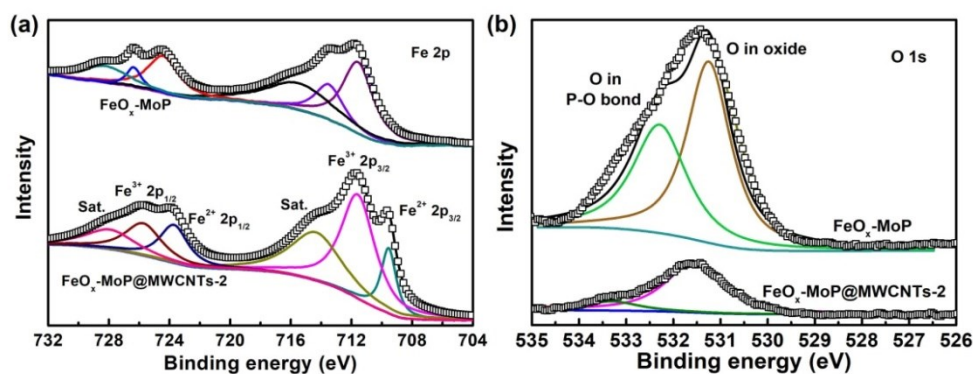

Figure S6. High-resolution XPS spectra of (a) Fe 2p and (b) O 1s.

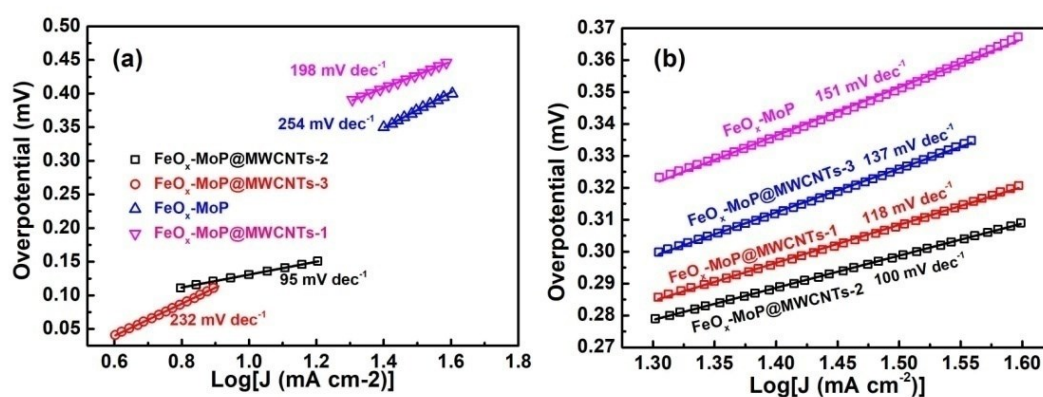

Figure S7. Tafel plots of the as-prepared samples derived from (a) HER and (b) OER LSV curves.

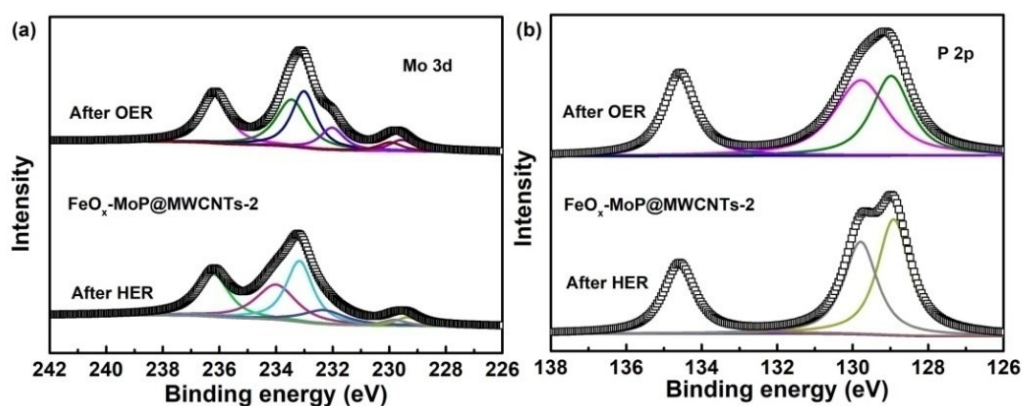

Figure S8. High resolution XPS spectra of FeO<sub>x</sub>-MoP@MWCNTs-2 in the regions of (a) Mo 3d and (b) P 2p after HER and OER measurements.



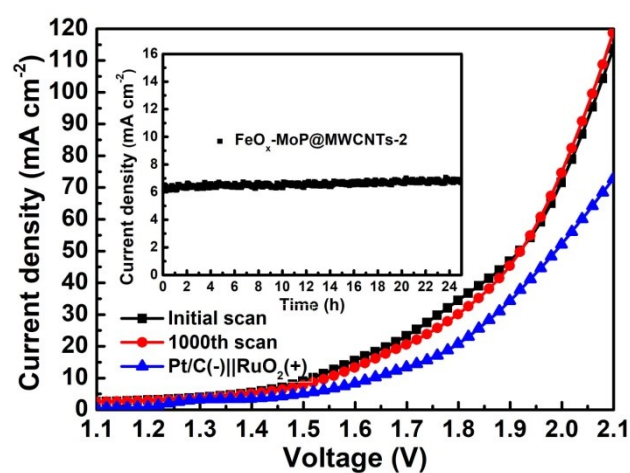

Figure S9. Overall water splitting performance of FeO<sub>x</sub>-MoP@MWCNTs-2 and Pt/C(-) || RuO<sub>2</sub>(+) cell. Inset is the catalytic stability of FeO<sub>x</sub>-MoP@MWCNTs-2 in 1.0 M KOH.

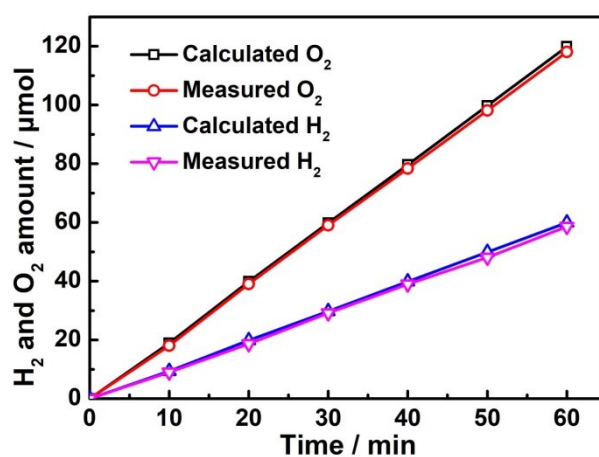

Figure S10. The amount of H<sub>2</sub> and O<sub>2</sub> experimentally measured and theoretically calculated as a function of time for FeO<sub>x</sub>-MoP@MWCNTs-2.

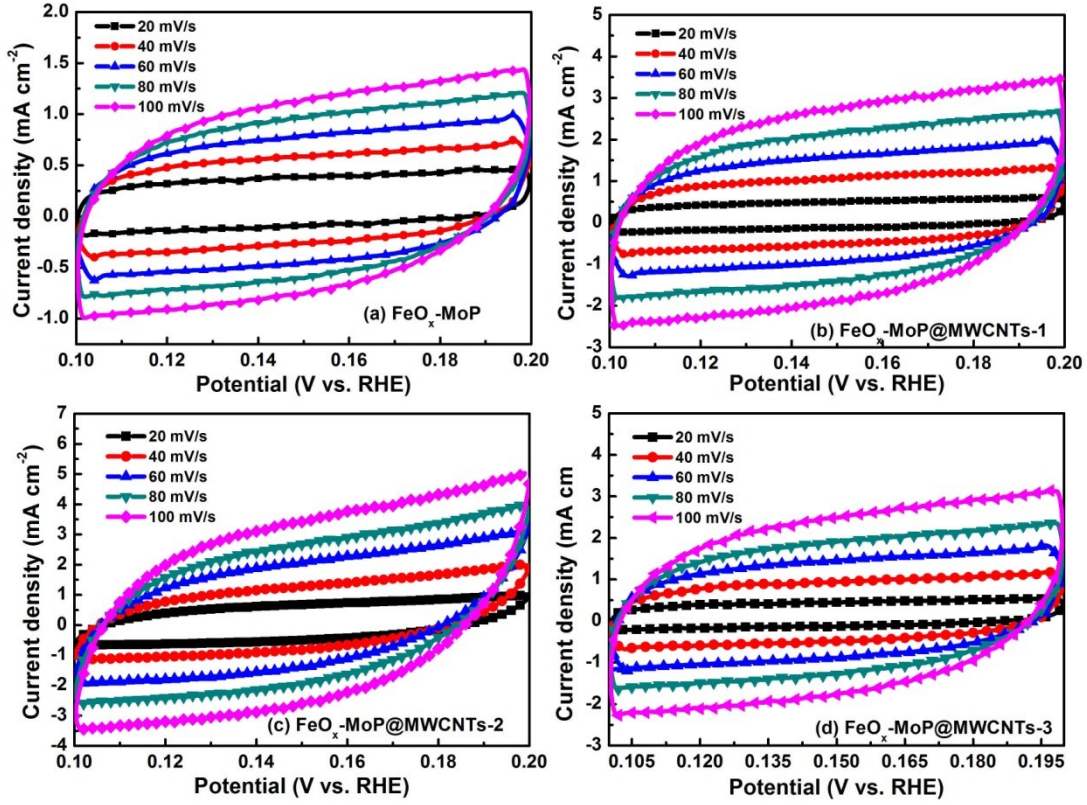

Figure S11. Cyclic voltammograms of (a)  $\text{FeO}_x\text{-MoP}$ , (b)  $\text{FeO}_x\text{-MoP@MWCNTs-1}$ , (c)  $\text{FeO}_x\text{-MoP@MWCNTs-2}$  and (d)  $\text{FeO}_x\text{-MoP@MWCNTs-3}$ .

### Computational method

We have employed the first-principles [1,2] to perform all Spin-polarization density functional theory (DFT) calculations within the generalized gradient approximation (GGA) using the Perdew-Burke-Ernzerhof (PBE) [3] formulation. We have chosen the projected augmented wave (PAW) potentials [4,5] to describe the ionic cores and take valence electrons into account using a plane wave basis set with a kinetic energy cutoff of 350 eV. Partial occupancies of the Kohn-Sham orbitals were allowed using the Gaussian smearing method and a width of 0.06 eV. The electronic energy was considered self-consistent when the energy change was smaller than  $10^{-5}$  eV. A geometry optimization was considered convergent when the energy change was smaller than  $0.05 \text{ eV } \text{\AA}^{-1}$ . In addition, for the Fe atoms, the U schemes need to be applied, and the U has been set as 3.2 eV. The solvation model has been used in our calculation. The free energy was calculated using the equation:

$$G = E + ZPE - TS$$

where G, E, ZPE and TS are the free energy, total energy from DFT calculations, zero point energy and entropic contributions (T was set to be 300K), respectively.

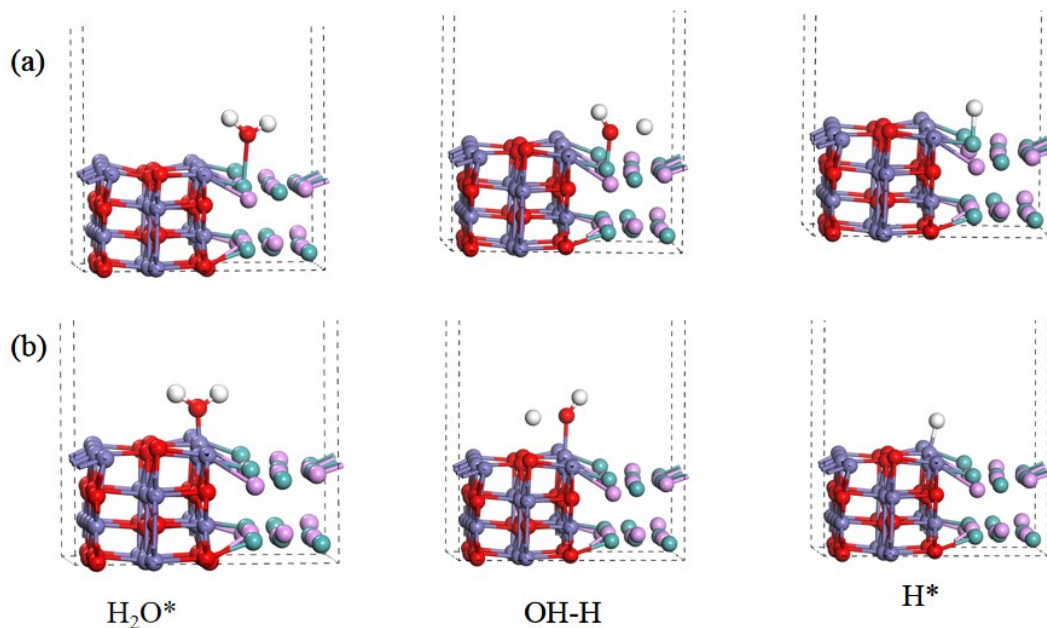

Figure S12. DFT-optimized structures of  $\text{FeO}_x\text{-MoP}$  for HER: (a) Mo sites and (b) Fe sites.

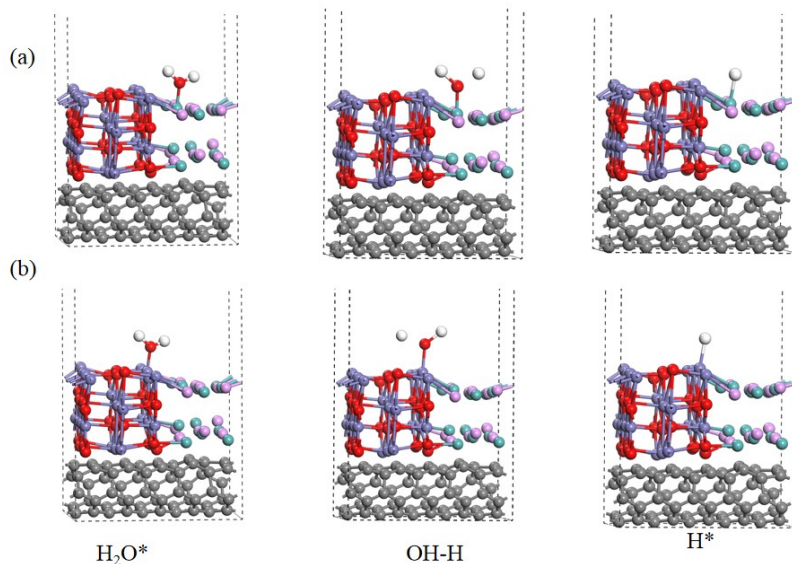

Figure S13. DFT-optimized structures of  $\text{FeO}_x\text{-MoP@MWCNTs-2}$  for HER: (a) Mo sites and (b) Fe sites.



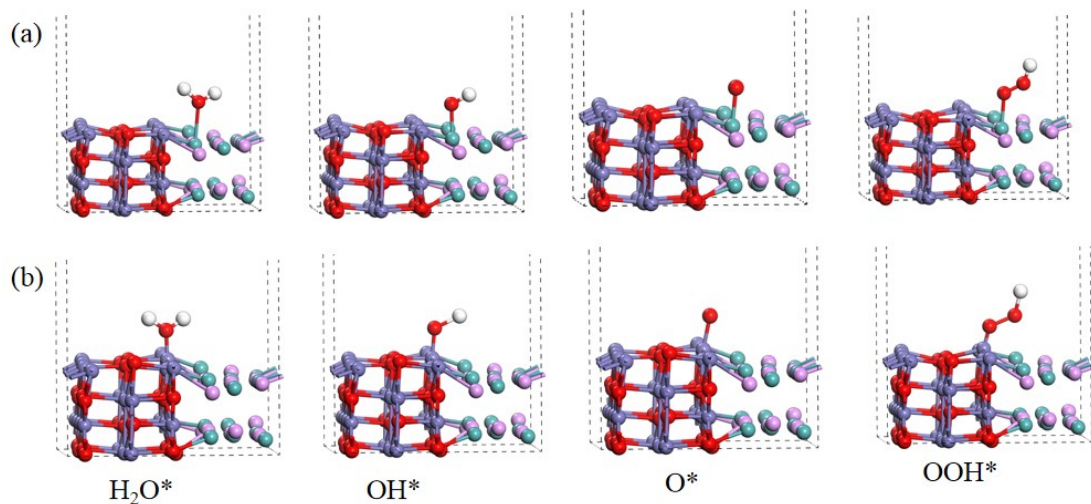

Figure S14. DFT-optimized structures of  $\text{FeO}_x\text{-MoP}$  for OER: (a) Mo sites and (b) Fe sites.

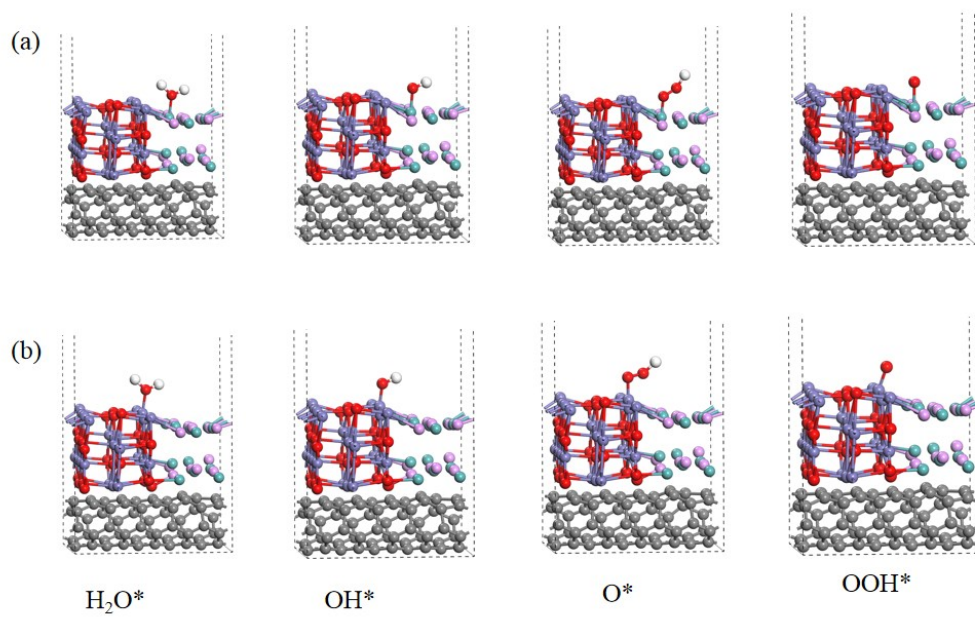

Figure S15. DFT-optimized structures of  $\text{FeO}_x\text{-MoP@MWCNTs-2}$  for OER: (a) Mo sites and (b) Fe sites.

**Table S1.** Comparison of HER performance of FeO<sub>x</sub>-MoP@MWCNTs-2 with some other reported electrocatalysts.

| <b>Electrocatalysts</b>             | <b>Overpotential (mV@10 mA cm<sup>-2</sup>)</b> | <b>Ref.</b>      |
|-------------------------------------|-------------------------------------------------|------------------|
| FeO <sub>x</sub> /FeP               | 96 (1.0 M KOH)                                  | 6                |
| CoP <sub>3</sub> /CoMoP-5/NF        | 110 (1.0 M KOH)                                 | 7                |
| MoP/Ni <sub>2</sub> P               | 100.2 (1.0 M KOH)                               | 8                |
| MoP nanoflakes/NF                   | 114 (1.0 M KOH)                                 | 9                |
| FeMoP-0.10                          | 195 (1.0 M KOH)                                 | 10               |
| MoP@NC-MF                           | 125 (0.5 M H <sub>2</sub> SO <sub>4</sub> )     | 11               |
| MoP NTs/Mo                          | 269 (1.0 M KOH)                                 | 12               |
| MoPS/NC                             | 170 (1.0 M KOH)                                 | 13               |
| MoP@NPCS                            | 113 (0.5 M H <sub>2</sub> SO <sub>4</sub> )     | 14               |
| NiFeP@C                             | 160 (1.0 M KOH)                                 | 15               |
| MoP@NCHSs-900                       | 92 (1.0 M KOH)                                  | 16               |
| MoC-MoP/BCNC NFs                    | 137 (1.0 M KOH)                                 | 17               |
| MoP@NCF                             | 129.5 (1.0 M KOH)                               | 18               |
| MoP@NCF                             | 234.6 (0.5 M H <sub>2</sub> SO <sub>4</sub> )   | 19               |
| Hierarchical MoP/NF                 | 114 (1.0 M KOH)                                 | 20               |
| CoP(MoP)-CoMoO <sub>3</sub> @CN     | 198 (1.0 M KOH)                                 | 21               |
| MoP-RGO-0.5                         | 152 (1.0 M KOH)                                 | 22               |
| MnP-MoP NPs/N,P-Gr                  | 74.2 (1.0 M KOH)                                | 23               |
| MoS <sub>2</sub> -MoP-CNS           | 93 (1.0 M KOH)                                  | 24               |
| MoS <sub>2</sub> -MoP/C             | 102 (0.5 M H <sub>2</sub> SO <sub>4</sub> )     | 25               |
| Defects-rich MoP/C                  | 100 (1.0 M KOH)                                 | 26               |
| MoP-RGO                             | 117 (0.5 M H <sub>2</sub> SO <sub>4</sub> )     | 27               |
| <b>FeO<sub>x</sub>-MoP/MWCNTs-2</b> | <b>78</b>                                       | <b>This work</b> |

**Table S2.** Comparison of OER performance of FeO<sub>x</sub>-MoP@MWCNTs-2 with other reported electrocatalysts in alkaline electrolyte.

| Electrocatalysts                                         | Overpotential (mV@10 mA cm <sup>-2</sup> ) | Ref.             |
|----------------------------------------------------------|--------------------------------------------|------------------|
| MoP nanoflakes/NF                                        | 265                                        | 9                |
| NiFeP@C                                                  | 260                                        | 15               |
| Hierarchical MoP/NF                                      | 265                                        | 20               |
| CoP(MoP)-CoMoO <sub>3</sub> @CN                          | 296                                        | 21               |
| FeCo/SWCNT                                               | 253                                        | 28               |
| Co/Co <sub>9</sub> S <sub>8</sub> @SNGS-1000             | 290                                        | 29               |
| Co <sub>9</sub> S <sub>8</sub> @NOSC-900                 | 340                                        | 30               |
| Ni <sub>3</sub> S <sub>2</sub> @Co(OH) <sub>2</sub>      | 257                                        | 31               |
| Mo <sub>5.9</sub> Ni <sub>94.1</sub> S/NF                | 213                                        | 32               |
| NiFe/ Co <sub>9</sub> S <sub>8</sub> /Carbon Cloth       | 219                                        | 33               |
| Co@Co <sub>9</sub> S <sub>8</sub>                        | 285                                        | 34               |
| CoFe <sub>2</sub> O <sub>4</sub> @NF                     | 250                                        | 35               |
| Ni <sub>1</sub> Co <sub>1</sub> O <sub>2</sub> NWs       | 248                                        | 36               |
| NiCo <sub>2</sub> O <sub>4</sub> @CoMoO <sub>4</sub> /NF | 265 (20)                                   | 37               |
| <b>FeO<sub>x</sub>-MoP/MWCNTs-2</b>                      | <b>229</b>                                 | <b>This work</b> |

**Table S3.** Comparison of the overall water splitting performance of FeO<sub>x</sub>-MoP@MWCNTs-2 with other reported electrocatalysts in alkaline electrolyte.

| Electrocatalysts                                         | Cell voltage (V@10 mA cm <sup>-2</sup> ) | Ref.             |
|----------------------------------------------------------|------------------------------------------|------------------|
| MoP/Ni <sub>2</sub> P                                    | 1.55                                     | 8                |
| Hierarchical MoP/NF                                      | 1.62                                     | 20               |
| CoP(MoP)-CoMoO <sub>3</sub> @CN                          | 1.55                                     | 21               |
| Co/Co <sub>9</sub> S <sub>8</sub> @SNGS-1000             | 1.58                                     | 29               |
| Co <sub>9</sub> S <sub>8</sub> @NOSC-900                 | 1.60                                     | 30               |
| Ni <sub>3</sub> S <sub>2</sub> @Co(OH) <sub>2</sub>      | 1.61                                     | 31               |
| Mo <sub>5.9</sub> Ni <sub>94.1</sub> S/NF                | 1.485                                    | 32               |
| Ni <sub>1</sub> Co <sub>1</sub> O <sub>2</sub> NWs       | 1.58                                     | 36               |
| NiCo <sub>2</sub> O <sub>4</sub> @CoMoO <sub>4</sub> /NF | 1.55                                     | 37               |
| CoP@NPCSs                                                | 1.64                                     | 38               |
| Fe-CoP/Ti                                                | 1.60                                     | 39               |
| Oxidized CoP                                             | 1.59                                     | 40               |
| Mo-doped CoP                                             | 1.57                                     | 41               |
| Pt/C(-)    RuO <sub>2</sub> (+)                          | 1.63                                     | 21               |
| <b>FeO<sub>x</sub>-MoP/MWCNTs-2</b>                      | <b>1.51</b>                              | <b>This work</b> |

## References

- [1] G. Kresse, J. Furthmüller, Efficiency of Ab-Initio Total Energy Calculations for Metals and Semiconductors Using a Plane-Wave Basis Set, *Comput. Mater. Sci.*, 1996, **6**, 15-50.
- [2] G. Kresse, J. Furthmüller, Efficient Iterative Schemes for Ab Initio Total-Energy Calculations Using a Plane-Wave Basis Set, *Phys. Rev. B*, 1996, **54**, 11169-11186.
- [3] J. P. Perdew, K. Burke, M. Ernzerhof, Generalized Gradient Approximation Made Simple, *Phys. Rev. Lett.*, 1996, **77**, 3865-3868.
- [4] G. Kresse, D. Joubert, From Ultrasoft Pseudopotentials to the Projector Augmented-Wave Method, *Phys. Rev. B*, 1999, **59**, 1758-1775.
- [5] P. E. Blöchl, Projector Augmented-Wave Method, *Phys. Rev. B*, 1994, **50**, 17953-17979.
- [6] J. W. Huang, Y. Su, Y. D. Zhang, W. Q. Wu, C. Y. Wu, Y. H. Sun, R. F. Lu, G. F. Zou, Y. R. Li, J. Xiong, FeO<sub>x</sub>/FeP hybrid nanorods neutral hydrogen evolution electrocatalysis: insight into interface, *J. Mater. Chem. A*, 2018, **6**, 9467-9472.
- [7] D. L. Jiang, Y. Xu, R. Yang, D. Li, S. C. Meng, M. Chen, CoP<sub>3</sub>/CoMoP heterogeneous nanosheet arrays as robust electrocatalyst for pH-universal hydrogen evolution reaction, *ACS Sustain. Chem. Eng.*, 2019, **7(10)**, 9309-9317.
- [8] C. C. Du, M. X. Shang, J. X. Mao, W. B. Song, Hierarchical MoP/Ni<sub>2</sub>P heterostructures on nickel foam for efficient water splitting, *J. Mater. Chem. A*, 2017, **5(30)**, 15940-15949.
- [9] M. Wang, C. Ye, M. Xu, S. Bao, MoP nanoparticles with a P-rich outermost atomic layer embedded in N-doped porous carbon nanofibers: Self-supported electrodes for efficient hydrogen generation, *Nano Res.*, 2018, **11**, 4728-4734.
- [10] X. Liang, D. Z. Zhang, Z. Z. Wu, D. Z. Wang, The Fe-promoted MoP catalyst with high activity for water splitting, *Appl. Catal. A: Gen.*, 2016, **524**, 134-138.
- [11] Z. Y. Guo, P. Liu, J. Liu, F. L. Du, L. H. Jiang, Neural network inspired design of highly active and durable N-doped carbon interconnected molybdenum phosphide for hydrogen evolution reaction, *ACS Appl. Energy Mater.*, 2018, **1**, 5437-5445.
- [12] H. N. Yu, S. Cao, B. Fu, Z. J. Wu, J. J. Liu, L. Y. Piao, Self-supported nanotubular MoP electrode for highly efficient hydrogen evolution via water splitting, *Catal. Commun.*, 2019, **127**, 1-4.
- [13] Y. Huang, X. N. Song, J. Deng, C. Y. Zha, W. J. Huang, Y. L. Wu, Y. G. Li, Ultra-dispersed molybdenum phosphide and phosphosulfide nanoparticles on hierarchical carbonaceous scaffolds for hydrogen evolution electrocatalysis, *Appl. Catal. B: Environ.*, 2019, **245**, 656-661.
- [14] J. T. Ren, L. Chen, D. D. Yang, Z. Y. Yuan, Molybdenum-based nanoparticles (Mo<sub>2</sub>C, MoP and MoS<sub>2</sub>) coupled heteroatoms-doped carbon nanosheets for efficient hydrogen evolution reaction, *Appl. Catal. B: Environ.*, 2020, **263**, 118352.
- [15] Q. L. Kang, M. Y. Li, J. W. Shi, Q. Y. Lu, F. Gao, A universal strategy for carbon-supported transition metal phosphides as high-performance bifunctional electrocatalysts towards efficient overall water splitting, *ACS Appl. Mater. Interfaces*, 2020, **12**, 19447-19456.
- [16] D. Zhao, K. Sun, W. C. Cheong, L. R. Zheng, C. Zhang, S. J. Liu, X. Cao, K. L. Wu, Y. Pan, Z. W. Zhuang, B. T. Hu, D. S. Wang, Q. Peng, C. Chen, Y. D. Li,

- Synergistically interactive pyridinic-N–MoP sites: Identified active centers for enhanced hydrogen evolution in alkaline solution, *Angew. Chem. Int. Ed.*, 2020, **59**, 8982-8990.
- [17] N. N. Chen, Q. J. Mo, L. Q. He, X. Q. Huang, L. C. Yang, J. C. Zeng, Q. S. Gao, Heterostructured MoC-MoP/N-doped carbon nanofibers as efficient electrocatalysts for hydrogen evolution reaction, *Electrochim. Acta*, 2019, **299**, 708-716.
- [18] X. K. Huang, X. Wang, P. B. Jiang, K. Lan, J. H. Qin, L. Gong, K. Z. Wang, M. Yang, L. Ma, R. Li, Ultrasmall MoP embraced in nitrogen-doped carbon hybrid frameworks for highly efficient hydrogen evolution reaction in both acid and alkaline solutions, *Inorg. Chem. Front.*, 2019, **6**, 1482-1489.
- [19] J. S. Li, J. Y. Li, X. R. Wang, S. Zhang, J. Q. Sha, G. D. Liu, Reduced graphene oxide-supported MoP@P-doped porous carbon nano-octahedrons as high-performance electrocatalysts for hydrogen evolution, *ACS Sustainable Chem. Eng.*, 2018, **6**, 10252-10259.
- [20] Y. Y. Jiang, Y. Z. Lu, J. Y. Lin, X. Wang, Z. X. Shen, A hierarchical MoP nanoflake array supported on Ni foam: A bifunctional electrocatalyst for overall water splitting, *Small Methods*, 2018, **2**, 1700369.
- [21] L. Yu, Y. Xiao, C. L. Luan, J. T. Yang, H. Y. Qiao, Y. Wang, X. Zhang, X. P. Dai, Y. Yang, H. H. Zhao, Cobalt/molybdenum phosphide and oxide heterostructures encapsulated in N-doped carbon nanocomposite for overall water splitting in alkaline media, *ACS Appl. Mater. Interfaces*, 2019, **11**, 6890-6899.
- [22] Z. X. Wu, M. Song, Z. J. Zhang, J. Wang, X. Liu, Various strategies to tune the electrocatalytic performance of molybdenum phosphide supported on reduced graphene oxide for hydrogen evolution reaction, *J. Colloid Interf. Sci.*, 2019, **536**, 638-645.
- [23] C. D. Nguyen, V. H. Nguyen, T. Y. Vu, L. M. T. Pham, K. L. Vu-Huynh, Efficient and stable hybrid electrocatalyst of mixed MnP-MoP nanoparticles-N,P-codoped graphene for hydrogen evolution reaction, *Colloid. Surf. A*, 2020, **593**, 124609.
- [24] Z. X. Wu, M. Song, X. Liu, Nitrogen doped holey carbon with MoS<sub>2</sub>-MoP nanosheets for efficient hydrogen evolution reaction in alkaline medium, *J. Electrochem. Soc.*, 2018, **165**, F976-F980.
- [25] Z. X. Wu, J. Wang, K. D. Xia, W. Lei, X. Liu, D. L. Wang, MoS<sub>2</sub>-MoP heterostructured nanosheets on polymer-derived carbon as an electrocatalyst for hydrogen evolution reaction, *J. Mater. Chem. A*, 2018, **6**, 616-622.
- [26] B. T. Liu, J. Wang, D. D. Wang, J. C. Fu, W. B. Chen, Z. J. Fu, Q. P. Qiang, L. L. Peng, L. Zhao, J. M. Wei, J. B. Qiu, C. G. Ma, The mechanism and surface engineering of carbon encapsulate defects-rich molybdenum phosphide for the hydrogen evolution reaction in alkaline media, *J. Alloys Compd.*, 2021, **850**, 156737.
- [27] Z. X. Wu, J. Wang, J. Zhu, J. P. Guo, W. P. Xiao, C. J. Xuan, W. Lei, D. L. Wang, Highly efficient and stable MoP-RGO nanoparticles as electrocatalysts for hydrogen evolution, *Electrochim. Acta*, 2017, **232**, 254-261.
- [28] D. Y. Xie, Y. Chen, D. S. Yu, S. L. Han, J. N. Song, Y. Y. Xie, F. Hu, L. L. Li, S. J. Peng, Single-layer carbon-coated FeCo alloy nanoparticles embedded in single-walled carbon nanotubes for high oxygen electrocatalysis, *Chem. Commun.*, 2020, **56**, 6842-6845.
- [29] X. Zhang, S. W. Liu, Y. P. Zang, R. R. Liu, G. Q. Liu, G. Z. Wang, Y. X. Zhang, H. M. Zhang, H. J. Zhao, Co/Co<sub>9</sub>S<sub>8</sub>@S,N-doped porous graphene sheets derived



- from S, N dual organic ligands assembled Co-MOFs as superior electrocatalysts for full water splitting in alkaline media, *Nano Energy*, 2016, **30**, 93-102.
- [30] S. C. Huang, Y. Y. Meng, S. M. He, A. Goswami, Q. L. Wu, J. H. Li, S. F. Tong, T. Asefa, M. M. Wu, N-, O-, and S-Tridoped carbon-encapsulated Co<sub>9</sub>S<sub>8</sub> nanomaterials: Efficient bifunctional electrocatalysts for overall water splitting, *Adv. Funct. Mater.*, 2017, **27**, 1606585.
- [31] S. Wang, L. Xu, W. Lu, Synergistic effect: Hierarchical Ni<sub>3</sub>S<sub>2</sub>@Co(OH)<sub>2</sub> heterostructure as efficient bifunctional electrocatalyst for overall water splitting, *Appl. Surf. Sci.*, 2018, **457**, 156-163.
- [32] C. Du, Y. Men, X. Hei, J. Yu, G. Cheng, W. Luo, Mo-doped Ni<sub>3</sub>S<sub>2</sub> nanowires as high-performance electrocatalysts for overall water splitting, *ChemElectroChem*, 2018, **5**, 2564-2570.
- [33] C. H. Zhan, Z. Liu, Y. Zhou, M. L. Guo, X. L. Zhang, J. C. Tu, L. Ding, Y. Cao, Triple hierarchy and double synergies of NiFe/Co<sub>9</sub>S<sub>8</sub>/carbon cloth: a new and efficient electrocatalyst for the oxygen evolution reaction, *Nanoscale*, 2019, **11**(7), 3378-3385.
- [34] X. Yuan, J. Yin, Z. Liu, X. Wang, C. Dong, W. Dong, M. S. Riaz, Z. Zhang, M. Y. Chen, F. Huang, Charge transfer promoted high oxygen evolution activity of Co@Co<sub>9</sub>S<sub>8</sub> core-shell nanochains. *ACS Appl. Mater. Interf.*, 2018, **10**(14), 11565-11571.
- [35] F. Urbain, R. F. Du, P. Y. Tang, V. Smirnov, T. Andreu, F. Finger, N. J. Divins, J. Llorcs, J. Arbiol, A. Cabot, J. R. Morante, Upscaling high activity oxygen evolution catalysts based on CoFe<sub>2</sub>O<sub>4</sub> nanoparticles supported on nickel foam for power-to-gas electrochemical conversion with energy efficiencies above 80%, *Appl. Catal. B-Environ.*, 2019, **259**, 118055.
- [36] H. Xu, J. Wei, M. Zhang, J. Wang, Y. Shiraishi, L. Tian, Y. Du, Self-supported nickel-cobalt nanowires as highly efficient and stable electrocatalysts for overall water splitting, *Nanoscale*, 2018, **10**, 18767-18773.
- [37] Y. Gong, Z. Yang, Y. Lin, J. Wang, H. Pan, Z. Xu, Hierarchical heterostructure NiCo<sub>2</sub>O<sub>4</sub>@CoMoO<sub>4</sub>/NF as an efficient bifunctional electrocatalyst for overall water splitting, *J. Mater. Chem. A*, 2018, **6**, 16950-16958.
- [38] K. L. Wu, Z. Chen, W. C. Cheong, S. J. Liu, W. Zhu, X. Cao, K. A. Sun, Y. Lin, L. R. Zheng, W. S. Yan, Y. Pan, D. S. Wang, Q. Peng, C. Chen, Y. D. Li, Toward bifunctional overall water splitting electrocatalyst: General preparation of transition metal phosphide nanoparticles decorated N-doped porous carbon spheres, *ACS Appl. Mater. Interf.*, 2018, **10**(51), 44201-44208.
- [39] C. Tang, R. Zhang, W. Lu, L. He, X. Jiang, A. M. Asiri, X. Sun, Fe-doped CoP nanoarray: A monolithic multifunctional catalyst for highly efficient hydrogen generation, *Adv. Mater.*, 2017, **29**, 1602441.
- [40] J. F. Chang, Y. Xiao, M. L. Xiao, J. J. Ge, C. P. Liu, W. Xing, Surface oxidized cobalt-phosphide nanorods as an advanced oxygen evolution catalyst in alkaline solution, *ACS Catal.*, 2015, **5**(11), 6874-6878.
- [41] C. Guan, W. Xiao, H. J. Wu, X. M. Liu, W. J. Zang, H. Zhang, J. Ding, Y. P. Feng, S. J. Pennycook, J. Wang, Hollow Mo-doped CoP nanoarrays for efficient overall water splitting, *Nano Energy*, 2018, 73-80.
- [42]
